# Supplementary material for: The effectiveness and cost effectiveness of a hospital avoidance program in a residential aged care facility: a prospective cohort study and modelled decision analysis
Source: PubMed Central journal article supplement (PMC7720399; doi:10.1186/s12877-020-01904-1), 2020-12-07
Supplement: 12877_2020_1904_MOESM1_ESM.pdf [file 12877_2020_1904_MOESM1_ESM.pdf]

## Characteristics of the RACF population in the immediate geographic region

| RACF population characteristics                                 | Regional average<br>(N = 9 RACFs, 822 places) |
|-----------------------------------------------------------------|-----------------------------------------------|
| <b>Male (%)</b>                                                 | <b>34.9</b>                                   |
| 100+                                                            | 0.4                                           |
| 95–99                                                           | 2.7                                           |
| 90–94                                                           | 16.0                                          |
| 85–89                                                           | 25.1                                          |
| 80–84                                                           | 23.6                                          |
| 75–79                                                           | 15.6                                          |
| 70–74                                                           | 6.1                                           |
| 65–69                                                           | 5.7                                           |
| 60–64                                                           | 3.4                                           |
| 55–59                                                           | 1.1                                           |
| 50–54                                                           | 0.4                                           |
| 0–49                                                            | 0.0                                           |
| <b>Female (%)</b>                                               | <b>65.1</b>                                   |
| 100+                                                            | 1.2                                           |
| 95–99                                                           | 8.8                                           |
| 90–94                                                           | 21.2                                          |
| 85–89                                                           | 27.1                                          |
| 80–84                                                           | 18.6                                          |
| 75–79                                                           | 9.4                                           |
| 70–74                                                           | 7.6                                           |
| 65–69                                                           | 2.2                                           |
| 60–64                                                           | 1.8                                           |
| 55–59                                                           | 1.2                                           |
| 50–54                                                           | 0.6                                           |
| 0–49                                                            | 0.2                                           |
| <b>Average length of stay by discharge destination (months)</b> |                                               |
| Death                                                           | 37.8                                          |
| Other facility                                                  | 15.9                                          |
| Hospital                                                        | 0.5                                           |
| Home/community                                                  | 15.0                                          |
| Other facility                                                  | 0.5                                           |
| Places in residential aged care per 1,000 people aged 70+       | 73.6                                          |
| RACF residents with a dementia diagnosis (%)                    | 48.5                                          |

RACF = residential aged care facility
