# Supplementary material for: The effectiveness and cost effectiveness of a hospital avoidance program in a residential aged care facility: a prospective cohort study and modelled decision analysis
Source: PubMed Central journal article supplement (PMC7720399; doi:10.1186/s12877-020-01904-1), 2020-12-07
Supplement: 12877_2020_1904_MOESM2_ESM.pdf [file 12877_2020_1904_MOESM2_ESM.pdf]

## Costs of EDDIE implementation

| Implementation costs                              | \$AUD        |
|---------------------------------------------------|--------------|
| Decision support tool – printing costs            | 360          |
| Project staff time on implementation activities   |              |
| <i>Training and development (67 hrs)</i>          | 2793         |
| <i>Stakeholder engagement (12 hrs)</i>            | 494          |
| <i>Project management and leadership (14 hrs)</i> | 648          |
| <b>Total</b>                                      | <b>4,295</b> |
