# Supplementary material for: The effectiveness and cost effectiveness of a hospital avoidance program in a residential aged care facility: a prospective cohort study and modelled decision analysis
Source: PubMed Central journal article supplement (PMC7720399; doi:10.1186/s12877-020-01904-1), 2020-12-07

A: Density of the fitted Normal distribution for the annual number of hospital admissions: usual care period (orange dashed line) and intervention period (blue solid line)

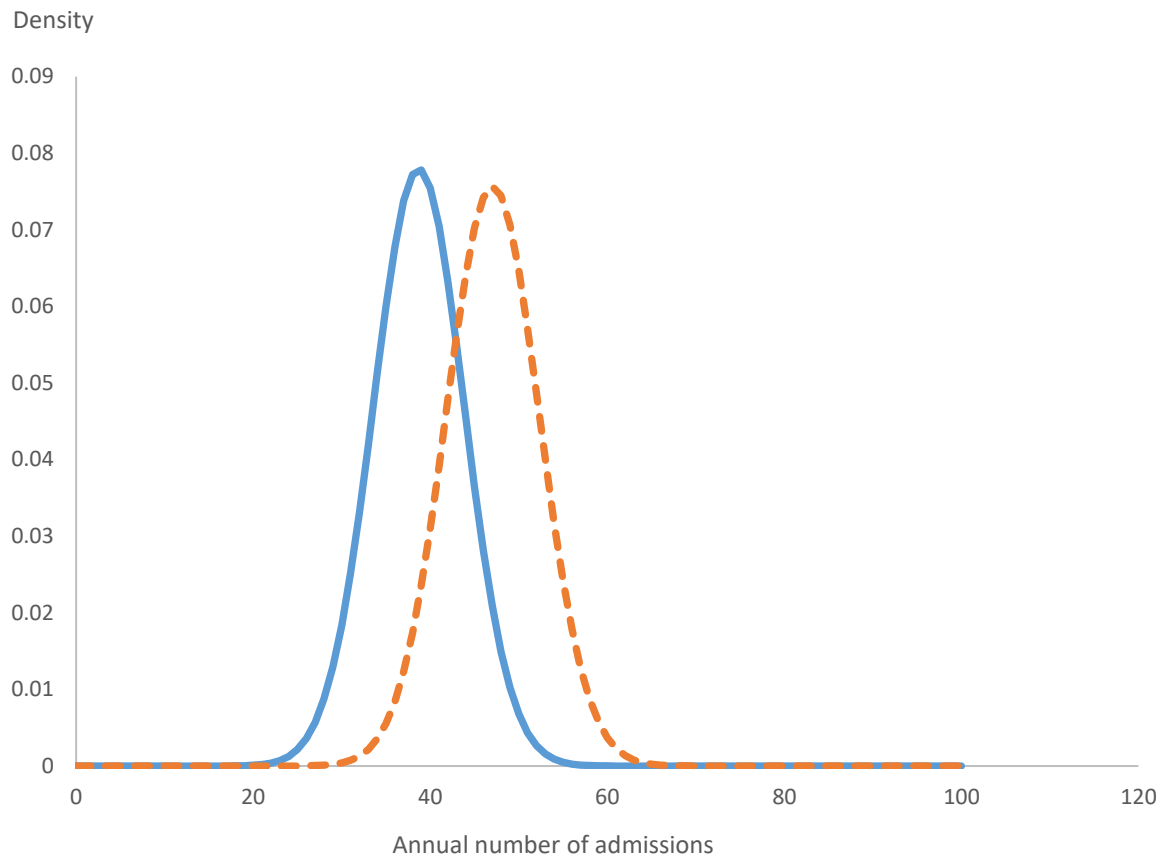

B: Density of the fitted Gamma distribution for length of stay: usual care cohort (orange dashed line) and intervention cohort (blue solid line).

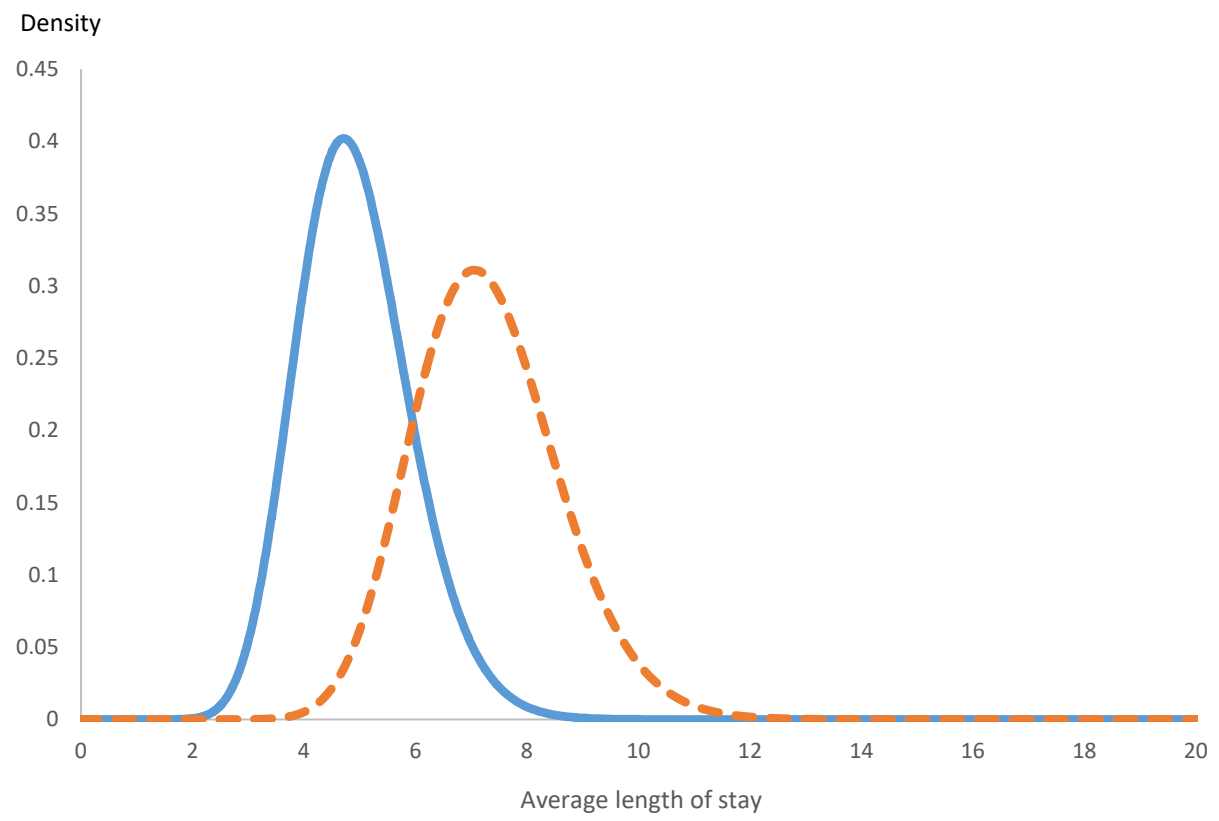

Supplement: 12877_2020_1904_MOESM4_ESM.pdf [file 12877_2020_1904_MOESM4_ESM.pdf]
